# Supplementary material for: Caspases in COVID-19 Disease and Sequela and the Therapeutic Potential of Caspase Inhibitors
Source: bioRxiv or medRxiv preprint supplement (doi:10.1101/2020.11.02.20223636), 2020-11-04
Supplement: Supplementary file [file media-1.pdf]

# Supplemental Figure 1

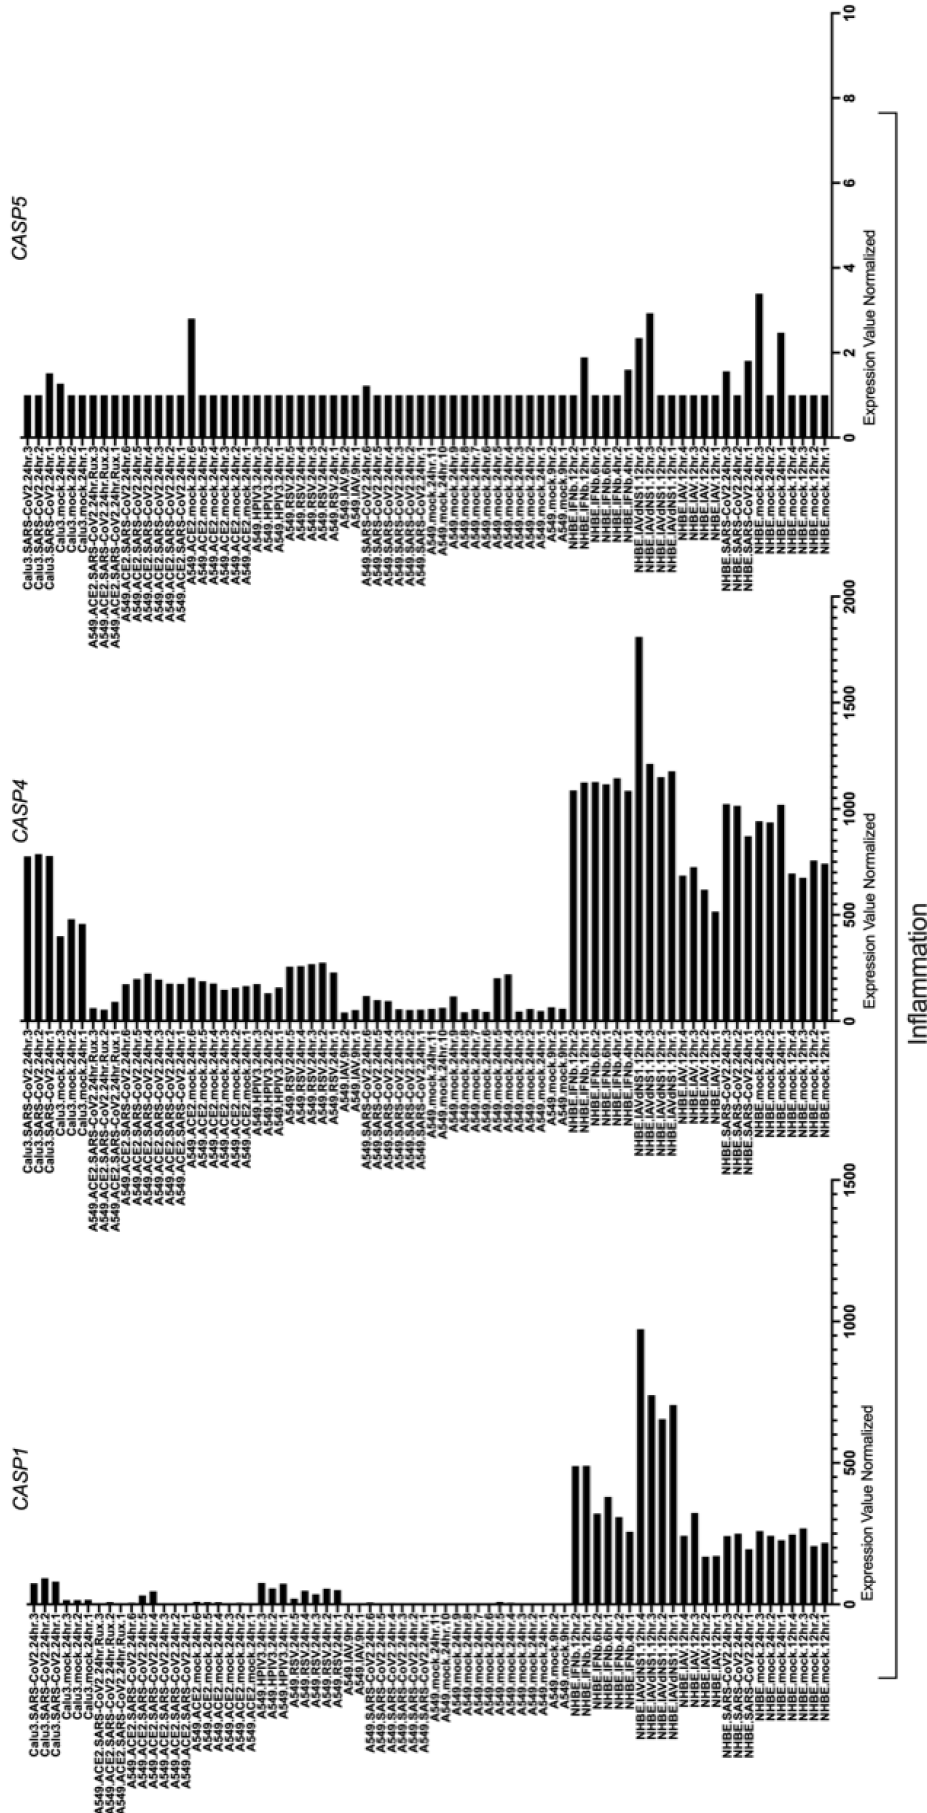

Inflammation

# Supplemental Figure 2

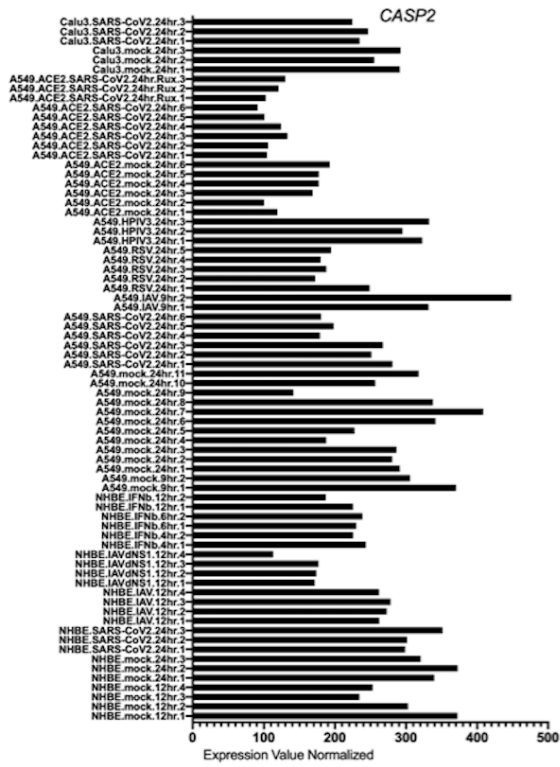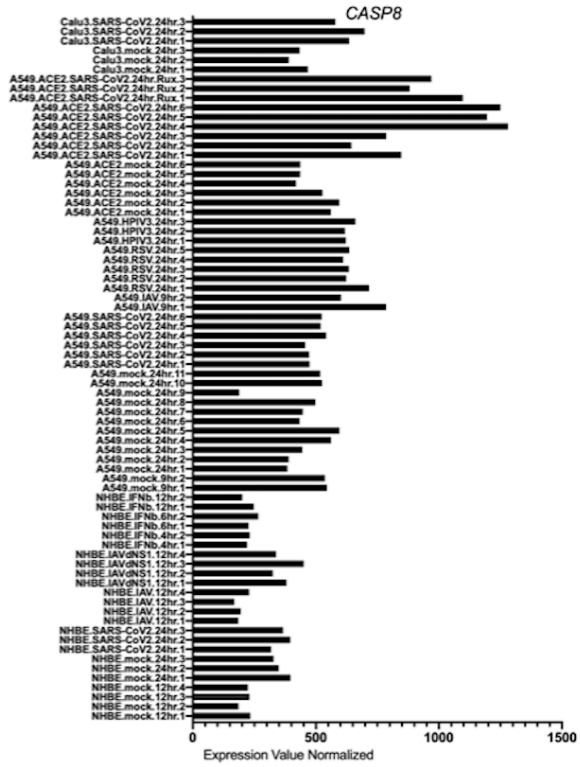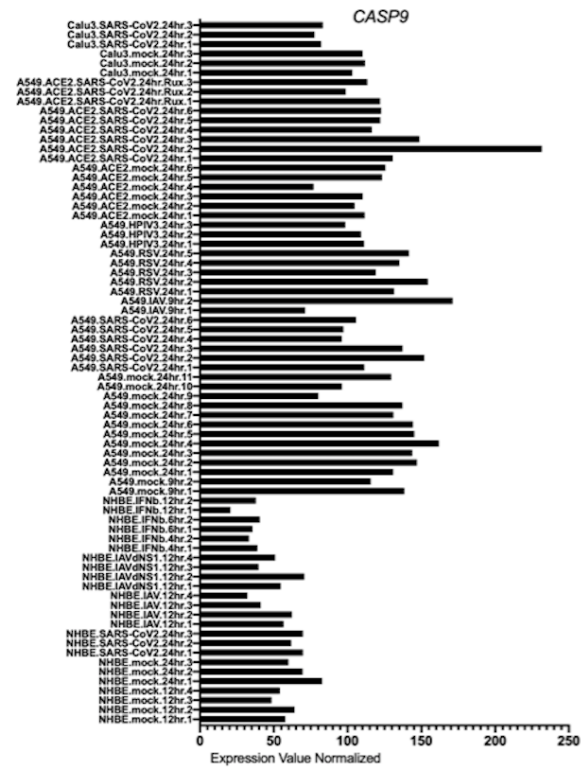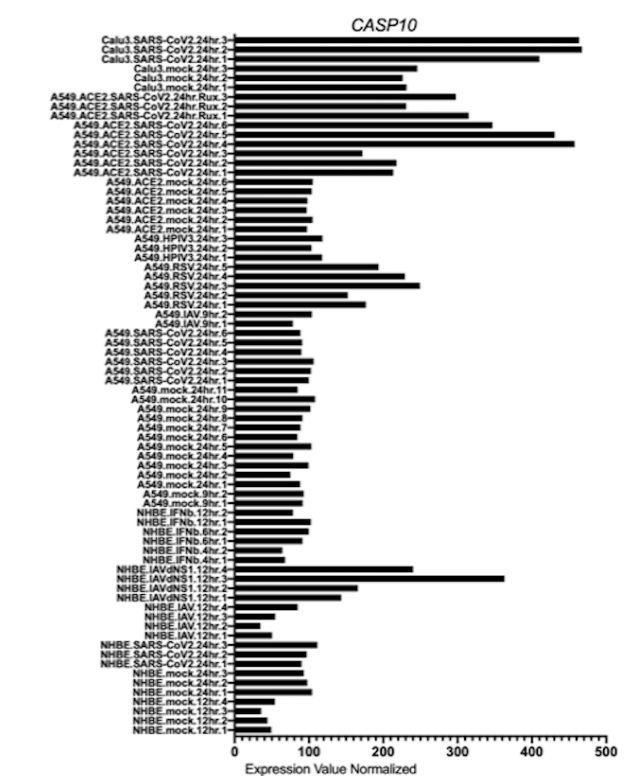

Apoptosis Initiator

Supplemental Figure 3

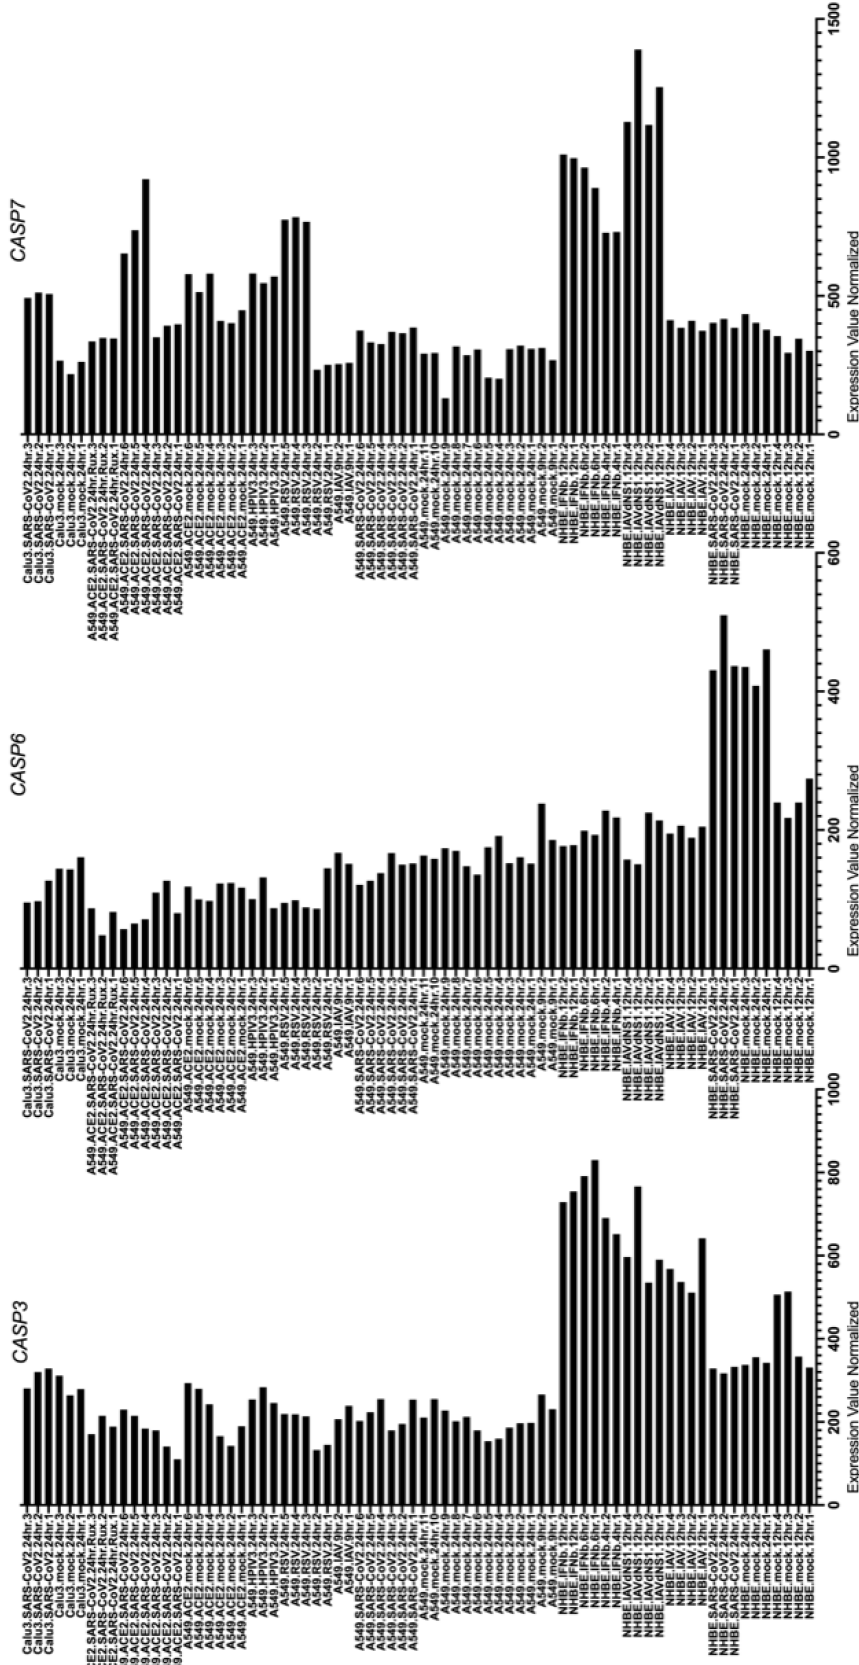

Apoptosis Executioner



**Supp Table 1**

|                                 | <b>COVID-19</b> |                |
|---------------------------------|-----------------|----------------|
|                                 | <b>ICU</b>      | <b>Non-ICU</b> |
| <b>Asthma</b>                   | 3 (21)          | 3 (27)         |
| <b>Autoimmune disease</b>       | 3 (21)          | 2 (18)         |
| <b>Cancer</b>                   | 1 (7)           | 3 (27)         |
| <b>COPD</b>                     | 4 (29)          | 3 (27)         |
| <b>Coronary Artery Disease</b>  | 2 (14)          | 6 (55)         |
| <b>Congestive Heart Failure</b> | 3 (21)          | 5 (45)         |
| <b>CKD without dialysis</b>     | 2 (14)          | 4 (36)         |
| <b>CKD/ESRD with dialysis</b>   | 3 (21)          | 2 (18)         |
| <b>Diabetes Mellitus</b>        | 4 (29)          | 4 (36)         |
| <b>Hyperlipidemia</b>           | 4 (29)          | 5 (45)         |
| <b>Hypertension</b>             | 6 (43)          | 5 (45)         |
| <b>Immune suppression</b>       | 5 (36)          | 4 (36)         |

## Supplemental Table 2.

| Lymphocyte Monitoring            | 18+ Normal  | Healthy |      | Covid-19+ |      | Covid-19+ ICU |      | Covid-19+ Non ICU |      |  |
|----------------------------------|-------------|---------|------|-----------|------|---------------|------|-------------------|------|--|
|                                  | Range       | Mean    | SEM  | Mean      | SEM  | Mean          | SEM  | Mean              | SEM  |  |
| Monocytes                        | 3.1 - 11.3  | 5.86    | 0.30 | 5.78      | 0.45 | 4.06          | 0.37 | 7.82              | 0.62 |  |
| Lymphocytes                      | 8.6 - 47.2  | 36.99   | 2.76 | 17.44     | 1.65 | 11.91         | 1.48 | 25.46             | 2.52 |  |
| CD3                              | 60.3 - 90.6 | 73.30   | 3.01 | 70.94     | 1.54 | 68.33         | 1.98 | 74.61             | 2.50 |  |
| CD20                             | 2.4 - 21.4  | 10.39   | 1.06 | 15.31     | 1.53 | 17.08         | 2.28 | 12.03             | 1.93 |  |
| CD3-CD16+ or CD56+               | 2.3 - 24.7  | 14.13   | 2.62 | 10.22     | 1.09 | 10.03         | 1.38 | 11.00             | 1.95 |  |
| %TBNK                            |             | 97.82   | 0.38 | 96.47     | 0.44 | 95.43         | 0.69 | 97.64             | 0.34 |  |
| CD3+CD16+ or CD56+               | 0.3 - 7.9   | 5.73    | 0.88 | 5.75      | 0.59 | 5.20          | 0.89 | 6.84              | 0.75 |  |
| T Cell Monitoring and Activation |             |         |      |           |      |               |      |                   |      |  |
| CD3+/CD4+                        | 28.3 - 69.4 | 46.52   | 2.65 | 46.08     | 1.61 | 47.63         | 2.35 | 42.89             | 2.10 |  |
| CD3+/CD8+                        | 8.6 - 39.5  | 21.47   | 2.14 | 21.43     | 1.72 | 17.60         | 1.42 | 27.60             | 3.33 |  |
| CD3+/CD4-/CD8-                   | 0.4 - 5     | 4.49    | 0.81 | 2.77      | 0.26 | 2.58          | 0.30 | 3.26              | 0.49 |  |
| CD3/alpha-beta                   | 56 - 87.6   | 67.37   | 3.17 | 66.60     | 1.52 | 64.33         | 1.89 | 69.67             | 2.65 |  |
| CC3/gamma-delta                  | 0.2 - 5.8   | 3.36    | 0.81 | 1.93      | 0.31 | 1.50          | 0.35 | 2.67              | 0.58 |  |
| DNT/alpha-beta                   | 0.1 - 1.7   | 1.06    | 0.12 | 0.92      | 0.08 | 1.02          | 0.13 | 0.84              | 0.09 |  |
| DNT/gamma-delta                  | 0.2 - 4.3   | 3.24    | 0.79 | 1.57      | 0.26 | 1.21          | 0.29 | 2.20              | 0.47 |  |
| CD3+/CD8+/CD57+                  | 1.2 - 17.2  | 7.31    | 1.73 | 8.72      | 1.30 | 5.60          | 0.98 | 13.39             | 2.58 |  |
| CD3+/HLA-DR                      | 1.0 - 9.6   | 1.35    | 0.25 | 3.31      | 0.37 | 3.21          | 0.31 | 3.35              | 0.84 |  |
| CD3+/CD25                        | 11.2 - 53.9 | 12.20   | 1.20 | 13.67     | 0.54 | 14.05         | 0.82 | 12.76             | 0.60 |  |
| T4/T8 Ratio                      | 0.71 - 4.3  | 2.50    | 0.25 | 2.80      | 0.29 | 3.25          | 0.44 | 2.04              | 0.30 |  |
| T Cell Memory                    |             |         |      |           |      |               |      |                   |      |  |
| CD3/CD4/CD45RO                   | 9.9 - 37.7  | 26.70   | 1.77 | 32.43     | 1.98 | 29.27         | 2.92 | 35.82             | 2.61 |  |
| CD3/CD4/CD45RA                   | 3.4 - 37.9  | 23.68   | 2.19 | 19.79     | 2.37 | 26.12         | 3.38 | 10.87             | 2.30 |  |
| CD3/CD8/CD45RO                   | 1.0 - 8.3   | 6.71    | 1.00 | 5.02      | 0.67 | 3.41          | 0.58 | 7.39              | 1.28 |  |
| CD3/CD8/CD45RA                   | 2.4 - 23    | 15.09   | 1.77 | 16.22     | 1.54 | 14.88         | 1.79 | 18.73             | 2.90 |  |
| CD4/CRTH2                        | 0.2 - 3.29  | 1.31    | 0.14 | 1.46      | 0.12 | 1.41          | 0.15 | 1.53              | 0.21 |  |
| CD4/CD45RO/CRTH2                 | 0.07 - 2.97 | 1.06    | 0.11 | 1.13      | 0.11 | 1.07          | 0.15 | 1.22              | 0.18 |  |
| CD8/CRTH2                        | <2.43       | 3.67    | 1.19 | 1.72      | 0.35 | 1.45          | 0.40 | 2.07              | 0.67 |  |
| CD8/CD45RO/CRTH2                 | <1.45       | 1.76    | 0.58 | 0.72      | 0.20 | 0.47          | 0.12 | 1.09              | 0.46 |  |
| B Cell Maturation and Subtypes   |             |         |      |           |      |               |      |                   |      |  |
| CD20/CD5                         | 0.1 - 4.5   | 0.97    | 0.16 | 0.66      | 0.11 | 0.65          | 0.15 | 0.67              | 0.18 |  |
| CD20/CD27                        | 0.4 - 5.4   | 1.91    | 0.26 | 2.19      | 0.31 | 2.23          | 0.40 | 1.95              | 0.54 |  |
| CD21 B-cells                     | 73.2 - 95   | 89.17   | 0.92 | 57.27     | 3.43 | 53.80         | 4.66 | 63.54             | 5.40 |  |
| CD21 dim B-cells                 | 3.7 - 21.1  | 8.35    | 0.56 | 34.03     | 2.95 | 35.48         | 3.85 | 29.90             | 4.87 |  |
| IgG B-cells                      | 2.5 - 17.4  | 4.80    | 0.40 | 8.21      | 0.71 | 7.67          | 0.78 | 9.17              | 1.42 |  |
| IgA B-cells                      | 1.5 - 7.3   | 6.61    | 0.62 | 5.55      | 0.55 | 5.83          | 0.86 | 4.82              | 0.63 |  |
| IgM B-cells                      | 69.1 - 97.6 | 85.39   | 0.79 | 84.49     | 0.98 | 84.29         | 1.24 | 84.73             | 1.81 |  |
| IgD B-cells                      | 69.0 - 97.6 | 85.17   | 1.08 | 77.97     | 1.39 | 77.42         | 1.54 | 78.48             | 2.81 |  |
| IgMCD27 B-cells                  | 5.6 - 27.2  | 13.60   | 1.43 | 8.76      | 0.84 | 9.02          | 1.17 | 8.79              | 1.36 |  |
| Dendritic Cell Monitoring        |             |         |      |           |      |               |      |                   |      |  |
| DC                               | 0.04 - 0.5  | 0.17    | 0.02 | 0.13      | 0.03 | 0.09          | 0.02 | 0.19              | 0.06 |  |
| CD11d                            | 32.6 - 86   | 60.17   | 3.03 | 60.89     | 4.22 | 50.91         | 5.82 | 72.42             | 5.44 |  |
| BDCA2                            | 8.9 - 59.9  | 31.10   | 3.35 | 9.80      | 1.77 | 8.02          | 2.02 | 13.38             | 3.27 |  |

| Lymphocyte Monitoring            | % CD3- Caspase 1 |             | % CD3+ Caspase 1 |             | % CD3+CD4 Caspase 1 |             |
|----------------------------------|------------------|-------------|------------------|-------------|---------------------|-------------|
|                                  | Nigericin +      | Nigericin - | Nigericin +      | Nigericin - | Nigericin +         | Nigericin - |
| Monocytes                        | 0.0478           | 0.2364      | 0.0034           | 0.0535      | 0.0071              | 0.1902      |
| Lymphocytes                      | 0.1022           | 0.0938      | 0.4072           | 0.1261      | 0.6053              | 0.5053      |
| CD3                              | 0.2239           | 0.0794      | 0.8922           | 0.9462      | 0.0994              | 0.4799      |
| CD20                             | 0.0708           | 0.0024      | 0.4962           | 0.0883      | 0.2428              | 0.2708      |
| CD3-CD16+ or CD56+               | 0.2281           | 0.1597      | 0.0585           | 0.0033      | 0.2261              | 0.0014      |
| %TBNK                            | 0.1822           | 0.8014      | 0.0707           | 0.1585      | 0.2183              | 0.2105      |
| CD3+CD16+ or CD56+               | 0.3994           | 0.2117      | 0.1702           | 0.0738      | 0.601               | 0.2402      |
| T Cell Monitoring and Activation |                  |             |                  |             |                     |             |
| CD3+/CD4+                        | 0.6709           | 0.6096      | 0.1232           | 0.3913      | 0.3922              | 0.4624      |
| CD3+/CD8+                        | 0.608            | 0.3932      | 0.3267           | 0.6263      | 0.4266              | 0.7696      |
| CD3+/CD4-/CD8-                   | 0.1454           | 0.1243      | 0.1001           | 0.0153      | 0.7973              | 0.019       |
| CD3/alpha-beta                   | 0.4105           | 0.1811      | 0.417            | 0.634       | 0.0417              | 0.2595      |
| CC3/gamma-delta                  | 0.0141           | 0.1712      | 0.0215           | 0.0077      | 0.7028              | 0.0169      |
| DNT/alpha-beta                   | 0.1929           | 0.5278      | 0.593            | 0.7579      | 0.9599              | 0.6647      |
| DNT/gamma-delta                  | 0.0485           | 0.1002      | 0.0434           | 0.0039      | 0.7021              | 0.0043      |
| CD3+/CD8+/CD57+                  | 0.1635           | 0.5568      | 0.0764           | 0.1440      | 0.6246              | 0.6712      |
| CD3+/HLA-DR                      | 0.0776           | 0.9094      | 0.2337           | 0.8529      | 0.4494              | 0.4775      |
| CD3+/CD25                        | 0.8964           | 0.9711      | 0.5885           | 0.2219      | 0.2188              | 0.5518      |
| T4/T8 Ratio                      | 0.4452           | 0.7438      | 0.1734           | 0.6015      | 0.5964              | 0.7592      |
| T Cell Memory                    |                  |             |                  |             |                     |             |
| CD3/CD4/CD45RO                   | 0.3395           | 0.8005      | 0.0094           | 0.2178      | 0.0001              | 0.1708      |
| CD3/CD4/CD45RA                   | 0.5221           | 0.9367      | 0.0018           | 0.0995      | 0.004               | 0.1213      |
| CD3/CD8/CD45RO                   | 0.0242           | 0.1725      | 0.0948           | 0.1103      | 0.5399              | 0.5101      |
| CD3/CD8/CD45RA                   | 0.0575           | 0.388       | 0.9182           | 0.3908      | 0.3846              | 0.4088      |
| CD4/CRTH2                        | 0.7054           | 0.1075      | 0.028            | 0.0371      | 0.0049              | 0.0081      |
| CD4/CD45RO/CRTH2                 | 0.6206           | 0.2372      | 0.0173           | 0.03        | 0.0017              | 0.007       |
| CD8/CRTH2                        | 0.6995           | 0.7309      | 0.7685           | 0.9211      | 0.672               | 0.963       |
| CD8/CD45RO/CRTH2                 | 0.5391           | 0.1153      | 0.8389           | 0.2566      | 0.5109              | 0.2389      |
| B Cell Maturation and Subtypes   |                  |             |                  |             |                     |             |
| CD20/CD5                         | 0.36             | 0.6781      | 0.8324           | 0.2975      | 0.46                | 0.3127      |
| CD20/CD27                        | 0.2057           | 0.0003      | 0.9959           | 0.0648      | 0.0829              | 0.2098      |
| CD21 B-cells                     | 0.4523           | 0.5262      | 0.9629           | 0.8012      | 0.5335              | 0.6533      |
| CD21 dim B-cells                 | 0.5599           | 0.7177      | 0.8625           | 0.813       | 0.6934              | 0.9084      |
| IgG B-cells                      | 0.35             | 0.0271      | 0.3069           | 0.0782      | 0.3498              | 0.107       |
| IgA B-cells                      | 0.7525           | 0.3071      | 0.5451           | 0.1946      | 0.8895              | 0.3013      |
| IgM B-cells                      | 0.9812           | 0.2815      | 0.5311           | 0.1143      | 0.8302              | 0.1667      |
| IgD B-cells                      | 0.4499           | 0.4945      | 0.5885           | 0.2219      | 0.1677              | 0.1857      |
| IgMCD27 B-cells                  | 0.0964           | 0.0342      | 0.183            | 0.0677      | 0.9072              | 0.1732      |
| Dendritic Cell Monitoring        |                  |             |                  |             |                     |             |
| DC                               | 0.3404           | 0.5682      | 0.2457           | 0.0183      | 0.9353              | 0.1088      |
| CD11d                            | 0.113            | 0.6528      | 0.0007           | 0.5627      | 0.0195              | 0.8607      |
| BDCA2                            | 0.687            | 0.003       | 0.27             | 0.0051      | 0.4543              | 0.0187      |

Supplementary information on antibodies:

The antibodies utilized from Thermo Fisher Scientific were CD56 SB436 [TULY56], CD45 eF506 [HI130], CD3 FITC [SK7], CD16 PE [B73.1], CD8 PerCP-eF710 [SK1] CD14 PE-CY7 [61D3], CD4 APC [SK-3], CD20 APC-eF780 [2H7] CD25 EF450 [CD25-4E3], CD57 FITC [TBo1], TCR $\gamma$ - $\delta$  PE [B1.1], CD4 PerCP-eF710 [SK-3], CD3 PE-CY7 [SK7], TCR  $\alpha\beta$  APC [IP26], HLA-DR AF700 [LN3], CD8 APC-eF780 [SL1], IgD SB436 [IA6-2], IgA FC Secondary Antibody FITC, IgG FC Secondary Antibody PE, IgM PerCP-eF710 [SA-DA4], CD19 PE-CY7 [SJ25C1], CD27 APC [O323], CD5 FITC [UCHT2], CD21 PE [HB5], CD27 PerCP-eF710 [O323], CD45RA FITC [HI100], CD45RO PerCP-eF710 [UCHL1], CD294 APC [BM16], CD4 AF700 [RPA-T4], CD3 FITC [SK7], CD14 FITC [61D3], CD16 FITC [3G8], CD19 FITC [SJ25-C1], CD20 FITC [2H7], CD56 FITC [TULY56], CD34 FITC [4H11], CD11c PE [3.9], HLA-DR PerCP-EF710 [L243], CD303a APC [201A], CD4 SB600 [SK-3], CD45RA FITC [HI100], CD3 PE-CY7 [SK7], CD8 AF700 [SK1], CCR5 APC [NP-6G4], CD25 APC [BC96], CD317 PE [26F8], IL-6 PE-CY7 [MQ2-13A5], MIP1- $\beta$  APC [FL34Z3L].

The antibodies utilized from BD Bioscience were HLADR BV480 [G46-6], CD38 PerCP-CY5.5 [HIT2], CD28 APC [CD28.2], CD45 APC H7 [2D1], CD278 BV421 [DX29], CXCR5 PerCP-CY5.5 [RF8B2], CD127 BV480 [HIL-7R-M21], CD45RO PerCP-CY5.5 [UCHL1], CD20 APC-H7 [2H7], CD11b BV421 [ICRF44], CD16 FITC [NKP15], MIP1- $\alpha$  PE [11A3], HLA-DR PerPC-Cy5.5 [L243]. TNF- $\alpha$  BV421 [Mab11] was from Biolegend (San Diego, CA).
